# Supplementary material for: Adherence to anti-seizure medications and self-reported availability and affordability of the medications in Addis Ababa, Ethiopia
Source: PubMed Central journal article supplement (PMC11469612; doi:10.1371/journal.pone.0299964), 2024-10-10
Supplement: pone.0299964.s002.pdf [file pone.0299964.s002.pdf]

**Annex IV: የአማርኛ መጠይቅ ቅፅ**

| ኤካ ኮተቤ አጠቃላይ ሆስፒታል, አዲስ አበባ, ኢትዮጵያ |                                           |                                                                                                                             |                                                   |
|------------------------------------|-------------------------------------------|-----------------------------------------------------------------------------------------------------------------------------|---------------------------------------------------|
| ክፍል 1. ስለ ታካሚው አጠቃላይ መግለጫዎች        |                                           |                                                                                                                             |                                                   |
| ተ.ቁ                                | ጥያቄዎች                                     | መልሶች እና ኮድ መስጠት                                                                                                             | አስተያየቶች                                           |
| 1.                                 | እድሜህ/ሽ ስንት ነው (በቁጥር ይጻፍ)                  | [ ] [ ]                                                                                                                     |                                                   |
| 2.                                 | ጾታ                                        | 1. ሴት<br>2. ወንድ                                                                                                             |                                                   |
| 3.                                 | የጋብቻ ሁኔታ                                  | 1. ያላገባ<br>2. ያገባ<br>3. የፈታ/ች<br>4. ባል የሞተባት /ሚስት የሞተችበት                                                                    |                                                   |
| 4.                                 | የትምህርት ደረጃ                                | 1. መደበኛ ትምህርት የለም<br>2. አንደኛ ደረጃ (ከ 1-8 ክፍል)<br>3. ሁለተኛ ደረጃ (ከ9-12 ክፍል)<br>4. የሙያ የምስክር ወረቀት<br>5. ዲፕሎማ<br>6. ዲግሪ እና ከዛ በላይ |                                                   |
| 5.                                 | አዘወትረው የሚኖሩበት የመኖሪያ ቦታዎ የት ነው?            | 1. በዚህ ክፍለ ከተማ ውስጥ<br>2. አዲስ አበባ<br>3. ከአዲስ አበባ ውጪ                                                                          |                                                   |
| 6.                                 | በአሁኑ ጊዜ በእርስዎ ቤተሰብ ውስጥ ስንት ሰዎች አብረው ይኖራሉ? | [ ] [ ]                                                                                                                     |                                                   |
| 7.                                 | የስራ ሁኔታህ/ሽ ምንድን ነው?                       | 1. ገቢ ባለው መልኩ ተቀጥረው ይሰራሉ<br>2. ገቢ የሌለው ስራ ይሰራሉ<br>3. ተማሪ<br>4. ምንም ስራ አልሰሩም                                                 | ለዚህ ጥያቄ 'ገቢ የሌለው ስራ እሰራለው' ከሆነ መልሱ ወደ ክፍል 2 ይዝላሉ። |

|    |                           |          |  |
|----|---------------------------|----------|--|
| 8. | በአማካኝ ወርሃዊ ገቢዎ ምን ያህል ነው? | _____ ብር |  |
|----|---------------------------|----------|--|

**ክፍል 2: ክሊኒካዊ ባህሪያት**

|     |                                                                                                                                                                      |                                                       |  |
|-----|----------------------------------------------------------------------------------------------------------------------------------------------------------------------|-------------------------------------------------------|--|
| 9.  | የሚጥል በሽታ እንዳለብህ/ሽ ሲታወቅ ዕድሜህ/ሽ ስንት ነበር?                                                                                                                               | [__ __]                                               |  |
| 10. | የማንቀጥቀጥ አይነቶች                                                                                                                                                        | 1. ሙሉ የሰውነት አካል<br>2. ግማሽ የሰውነት ክፍል<br>3. ሌላ          |  |
| 11. | የሚወሰዱ መድሃኒቶች ብዛት                                                                                                                                                     | 1. ምንም<br>2. አንድ መድሃኒት<br>3. ሁለት መድሃኒት<br>4. ብዙ መድሃኒት |  |
| 12. | መድሃኒቱን መውሰድ እንዲያቆሙ የሚገፋፋዎት የጎንዮሽ ጉዳት አጋጥሞዎት ያውቃል? (ለምሳሌ የመንፈስ ጭንቀት፣ ግራ መጋባት፣ ድክመት፣ የዓይን ብዥታ፣ ራስ ምታት፣ ቅዠት፣ መርሳት፣ የቆዳ ሽፍታ፣ መነጨነጨ እና ሌሎችም)                              | 1. አዎ<br>2. አይ                                        |  |
| 13. | ወደዚህ የህክምና ተቋም ለመጨረሻ ጊዜ ከጎበኙ በኋላ መድሃኒቱን መውሰድ እንዲያቆሙ የሚገፋፋዎት የጎንዮሽ ጉዳት አጋጥሞዎታል? (ለምሳሌ የመንፈስ ጭንቀት፣ ግራ መጋባት፣ ድክመት፣ የዓይን ብዥታ፣ ራስ ምታት፣ ቅዠት፣ መርሳት፣ የቆዳ ሽፍታ፣ መነጨነጨ እና ሌሎችም) | 1. አዎ<br>2. አይ                                        |  |
| 14. | ከሚጥል በሽታው በተጨማሪ የረጅም ጊዜ መድሃኒት የሚያስፈልገው በሽታ አሎት? (ለምሳሌ የስኳር በሽታ፣ የደም ግፊት፣ የልብ ሕመም፣ የኩላሊት በሽታ፣ የአእምሮ ሕመም ወይም ሌሎች...)                                                   | 1. አዎ<br>2. አይ                                        |  |

**ክፍል 3: ሳይኮሶጂያል ባህሪያት (ማህበራዊ ድጋፍ)**

|     |                                                   |                          |  |
|-----|---------------------------------------------------|--------------------------|--|
| 15. | እርዳታ በምትፈልግበት/በምትፈልገበት ሰዓት አቅርቦ የሚያወራህ ሰው ታገኛለህ/ሽ | 1. በጣም ብዙ ጊዜ<br>2. ብዙ ጊዜ |  |
|-----|---------------------------------------------------|--------------------------|--|

|                                                   |                                                                    |                                                                                                                                                                                                                            |                         |
|---------------------------------------------------|--------------------------------------------------------------------|----------------------------------------------------------------------------------------------------------------------------------------------------------------------------------------------------------------------------|-------------------------|
|                                                   |                                                                    | <ol style="list-style-type: none"> <li>3. አንዳንድ ጊዜ</li> <li>4. በጥቂቱ</li> <li>5. በፍጹም</li> </ol>                                                                                                                            |                         |
| <b>ክፍል 4: የሚጥል በሽታ መድኃኒት ተገኝነት እና የዋጋ ተመጣጣኝነት</b> |                                                                    |                                                                                                                                                                                                                            |                         |
| 16.                                               | የመጨረሻ የህክምና ክትትሎ ጊዜ የታዘዘሎትን የሚጥል በሽታ መድኃኒት ከየት ነው የገዙት?            | <ol style="list-style-type: none"> <li>1. ህክምና በሚያገኙበት በተመሳሳይ ፋርማሲ/ ተቋም ውስጥ</li> <li>2. ህክምና በሚያገኙበት ወይም ወደ መኖሪያዎ አቅራቢያ በሚገኝ ፋርማሲ/ የህክምና ተቋም ውስጥ</li> <li>3. ህክምና በሚያገኙበት ወይም ወደ መኖሪያዎ አቅራቢያ ባልሆነ ፋርማሲ/ ተቋም ውስጥ</li> </ol> |                         |
| 17.                                               | የሚጥል በሽታ መዳኒቶችን ለመግዛት በአብዛኛው ጊዜ ማን ይከፍልሎታል?                        | <ol style="list-style-type: none"> <li>1. ራሴ</li> <li>2. ቤተሰብ/ዘመዶች</li> <li>3. ነፃ መድሃኒት መቀበል</li> <li>4. ኢንሹራንስ</li> <li>5. የምሰራበት ድርጅት</li> </ol>                                                                         |                         |
| 18.                                               | የመጨረሻ የህክምና ክትትሎ ጊዜ የታዘዘሎትን የሚጥል በሽታ መድኃኒት ለማግኘት የገንዘብ ችግር አጋጥሞታል? | <ol style="list-style-type: none"> <li>1. አይ</li> <li>2. አዎ</li> </ol>                                                                                                                                                     |                         |
| 19.                                               | ከዚህ ቀደም መድሃኒቶችን ለማግኘት የገንዘብ ችግሮች አጋጥመውታል ይደውቃሉ?                    | <ol style="list-style-type: none"> <li>1. አይ</li> <li>2. አዎ</li> </ol>                                                                                                                                                     | ለዚህ ጥያቄ 'አይ' ከሆነ መልሱ ወደ |

|                                              |                                                                    |                                                                                                                                                                                                                          |               |
|----------------------------------------------|--------------------------------------------------------------------|--------------------------------------------------------------------------------------------------------------------------------------------------------------------------------------------------------------------------|---------------|
|                                              |                                                                    |                                                                                                                                                                                                                          | ክፍል 4<br>ይዝሉ። |
| 20.                                          | በሚያስፈልግበት ጊዜ ከዘመዶች፣ ድርጅቶች ወይም ከማንም ሰው የገንዘብ ድጋፍ ታገኛለህ/ሽ?           | 1. በጭራሽ<br>2. አሁን አላገኝም<br>3. አዎ፣ የገንዘብ ድጋፍ አገኛለሁ                                                                                                                                                                        |               |
| <b>ክፍል 5: መድሃኒትን በታዘዘው መሰረት በአግባቡ ስለመውሰድ</b> |                                                                    |                                                                                                                                                                                                                          |               |
|                                              | ጥያቄዎች: በመጨረሻው የህክምና ክትትል ጉብኝት እና አሁን ባለው ጉብኝት መካከል ያለውን ጊዜ ያመለክታል። | አ ዎ                                                                                                                                                                                                                      | አይ            |
| 1.1.                                         | ከመጨረሻው የህክምና ክትትል ጉብኝትዎ ጀምሮ መድሃኒትዎን መውሰድ ረስተዋል?                    |                                                                                                                                                                                                                          |               |
| 1.2.                                         | ባለፉት ሁለት ሳምንታት መድሃኒትዎን ያልወሰዱባቸው ቀናት ነበሩ?                           |                                                                                                                                                                                                                          |               |
| 1.3.                                         | ትላንትና ሁሉንም መድሃኒት ወስደዋል?                                            |                                                                                                                                                                                                                          |               |
| 1.4.                                         | ካለፈው የህክምና ክትትል ጉብኝትዎ በኋላ አንድ ጊዜ እንኳ መድሃኒትዎን ካልወሰዱ ምክንያቱ ምን ነበር:-  | 1. በጉዞ ምክንያት ወይም ከቤት ውጭ አድረው<br>2. ህመሙ የተሻሎ (የህመሙ ስሜቶች መጥፋት) ስለተሰማዎ<br>3. የመድሃኒቶቹ የጎንዮሽ ጉዳት ስለነበረ<br>4. መድሃኒት መውሰድ ምቹት ስለማይሰጡ<br>5. መድሃኒት መውሰድ ረስተው<br>6. በእጅ ምንም መድሃኒት አልነበረውም<br>7. መድሃኒቱን መግዛት አልቻሉም<br>8. በሌላ በምክንያት |               |
